# Supplementary material for: Association of Autoimmune Addison's Disease with Alleles of STAT4 and GATA3 in European Cohorts
Source: PLOS journal article supplement (doi:10.1371/journal.pone.0088991), 2014-03-10
Supplement: S1 (10.1371/journal.pone.0088991.s001) [file journal.pone.0088991.s001]

File S1: phase 1, 2 and 3 genotype data

| PHASE 1 |               |                           | Norway AAD (n=382) |     |     |                  |     | Norway controls (n=380) |     |                  |          |               |             |  |
|---------|---------------|---------------------------|--------------------|-----|-----|------------------|-----|-------------------------|-----|------------------|----------|---------------|-------------|--|
| Gene    | RS identifier | minor/<br>major<br>allele | aa                 | Aa  | AA  | Call<br>rate (%) | aa  | Aa                      | AA  | Call<br>rate (%) | HWE      | P<br>genotype | P<br>allele |  |
| CYP2R1  | rs11023374    | C/T                       | 27                 | 124 | 205 | 93               | 30  | 112                     | 217 | 94               | 0.0065   |               |             |  |
|         | rs1553006     | A/G                       | 74                 | 140 | 109 | 85               | 72  | 111                     | 116 | 79               | 0.000031 |               |             |  |
|         | rs10741661    | A/G                       | 72                 | 181 | 121 | 98               | 74  | 181                     | 120 | 99               | 0.7      | 0.98          | 0.88        |  |
| TBX21   | rs9910408     | G/A                       | 76                 | 168 | 134 | 99               | 66  | 177                     | 130 | 98               | 0.67     | 0.62          | 0.73        |  |
|         | rs11657388    | G/C                       | 12                 | 111 | 240 | 95               | 20  | 121                     | 230 | 98               | 0.44     | 0.24          | 0.14        |  |
| RORC    | rs3828057     | T/C                       | 74                 | 193 | 106 | 98               | 93  | 170                     | 112 | 99               | 0.078    | 0.15          | 0.5         |  |
|         | rs12045886    | C/T                       | 27                 | 145 | 183 | 93               | 24  | 48                      | 196 | 71               | 0.000001 |               |             |  |
|         | rs1521177     | G/T                       | 80                 | 164 | 95  | 89               | 81  | 178                     | 112 | 98               | 0.52     |               |             |  |
|         | rs7540530     | G/A                       | 93                 | 175 | 106 | 98               | 76  | 188                     | 100 | 96               | 0.47     | 0.33          | 0.55        |  |
|         | rs949969      | A/G                       | 16                 | 122 | 236 | 98               | 14  | 108                     | 254 | 99               | 0.55     | 0.44          | 0.22        |  |
| CYP24A1 | rs927650      | T/C                       | 89                 | 189 | 96  | 98               | 108 | 165                     | 102 | 99               | 0.02     | 0.16          | 0.51        |  |
|         | rs1570669     | G/A                       | 45                 | 156 | 169 | 97               | 40  | 152                     | 172 | 96               | 0.46     | 0.85          | 0.58        |  |
|         | rs2209314     | C/T                       | 17                 | 148 | 205 | 97               | 31  | 122                     | 217 | 97               | 0.024    | 0.031         | 0.91        |  |
|         | rs3787555     | A/C                       | 23                 | 135 | 217 | 98               | 24  | 161                     | 189 | 98               | 0.18     | 0.12          | 0.089       |  |
|         | rs2762941     | A/G                       | 39                 | 133 | 130 | 79               | 41  | 96                      | 150 | 76               | 0.00022  |               |             |  |
|         | rs2181874     | A/G                       | 11                 | 140 | 225 | 98               | 11  | 122                     | 239 | 98               | 0.33     | 0.44          | 0.28        |  |
|         | rs4809959     | G/A                       | 76                 | 193 | 104 | 98               | 92  | 177                     | 106 | 99               | 0.29     | 0.33          | 0.47        |  |
|         | rs4809960     | C/T                       | 15                 | 121 | 235 | 97               | 20  | 133                     | 213 | 96               | 0.9      | 0.31          | 0.13        |  |
|         | rs2296241     | G/A                       | 84                 | 189 | 97  | 97               | 100 | 169                     | 102 | 98               | 0.087    | 0.27          | 0.57        |  |
| STAT2   | rs2066808     | G/A                       | 2                  | 51  | 322 | 98               | 0   | 53                      | 312 | 96               | 0.13     | 0.36          | 0.96        |  |
|         | rs2066807     | G/C                       | 2                  | 53  | 321 | 98               | 0   | 52                      | 313 | 96               | 0.14     | 0.38          | 0.73        |  |
| VDR     | rs2189480     | T/G                       | 44                 | 173 | 150 | 96               | 58  | 150                     | 161 | 97               | 0.023    | 0.14          | 0.85        |  |
|         | rs3819545     | G/A                       | 52                 | 176 | 147 | 98               | 60  | 153                     | 152 | 96               | 0.045    | 0.35          | 0.98        |  |
|         | rs10875693    | A/T                       | 50                 | 123 | 154 | 86               | 41  | 168                     | 148 | 94               | 0.52     |               |             |  |
|         | rs11168275    | C/T                       | 22                 | 114 | 239 | 98               | 22  | 113                     | 232 | 97               | 0.11     | 0.99          | 0.88        |  |
|         | rs10735810    | A/G                       | 63                 | 154 | 159 | 98               | 55  | 208                     | 112 | 99               | 0.0087   |               |             |  |
|         | rs2254210     | A/G                       | 69                 | 180 | 120 | 97               | 68  | 170                     | 120 | 94               | 0.57     |               |             |  |
| IL23A   | rs11171806    | A/G                       | 2                  | 46  | 314 | 95               | 0   | 51                      | 319 | 97               | 0.15     | 0.33          | 0.99        |  |
| CYP27B1 | rs10876994    | C/A                       | 28                 | 110 | 200 | 88               | 32  | 121                     | 189 | 90               | 0.021    |               |             |  |
|         | rs4646536     | G/A                       | 44                 | 168 | 159 | 97               | 47  | 173                     | 148 | 97               | 0.75     | 0.76          | 0.47        |  |
|         | rs703842      | G/A                       | 45                 | 172 | 160 | 99               | 46  | 173                     | 147 | 96               | 0.66     | 0.82          | 0.56        |  |
| GATA3   | rs3802604     | G/A                       | 38                 | 160 | 171 | 97               | 62  | 154                     | 157 | 98               | 0.024    | 0.04          | 0.038       |  |
|         | rs570613      | C/T                       | 41                 | 183 | 138 | 95               | 62  | 167                     | 142 | 98               | 0.28     | 0.084         | 0.3         |  |
|         | rs569421      | C/T                       | 9                  | 135 | 228 | 97               | 14  | 115                     | 233 | 95               | 0.97     | 0.27          | 0.69        |  |
|         | rs444929      | C/T                       | 18                 | 106 | 241 | 96               | 26  | 121                     | 226 | 98               | 0.084    | 0.24          | 0.092       |  |

|        |            |     |     |     |     |    |    |     |     |    |          |        |         |
|--------|------------|-----|-----|-----|-----|----|----|-----|-----|----|----------|--------|---------|
| IFIH1  | rs10930046 | C/T | 0   | 17  | 343 | 94 | 0  | 20  | 334 | 93 | 0.58     |        |         |
|        | rs13023380 | G/A | 100 | 170 | 105 | 98 | 91 | 176 | 97  | 96 | 53       | 0.71   | 0.95    |
|        | rs3747517  | T/C | 26  | 138 | 212 | 98 | 31 | 146 | 193 | 97 | 0.65     | 0.47   | 0.22    |
| STAT4  | rs925847   | T/C | 24  | 146 | 195 | 96 | 32 | 126 | 210 | 97 | 0.042    | 0.21   | 0.75    |
|        | rs3821236  | A/G | 17  | 127 | 229 | 98 | 12 | 110 | 251 | 98 | 0.99     | 0.21   | 0.079   |
|        | rs16833260 | G/C | 37  | 185 | 144 | 96 | 34 | 163 | 177 | 98 | 0.69     | 0.09   | 0.058   |
|        | rs3024866  | G/A | 26  | 143 | 197 | 96 | 32 | 127 | 213 | 98 | 0.042    | 0.34   | 0.68    |
|        | rs1517352  | A/C | 63  | 157 | 142 | 95 | 54 | 164 | 150 | 97 | 0.4      | 0.6    | 0.42    |
|        | rs10931481 | G/A | 33  | 171 | 133 | 88 | 30 | 152 | 180 | 95 | 0.79     |        |         |
|        | rs4274624  | C/T | 25  | 152 | 198 | 98 | 9  | 128 | 238 | 99 | 0.086    | 0.0013 | 0.00045 |
|        | rs16833215 | G/A | 36  | 150 | 182 | 96 | 29 | 149 | 192 | 97 | 0.99     | 0.6    | 0.36    |
|        | rs4853543  | A/G | 0   | 0   | 261 | 68 | 52 | 1   | 308 | 95 | 0.000001 |        |         |
|        | rs11685878 | T/C | 65  | 172 | 127 | 95 | 66 | 173 | 125 | 96 | 0.65     | 0.99   | 0.87    |
|        | rs4853546  | A/G | 48  | 159 | 163 | 97 | 43 | 170 | 161 | 98 | 0.85     | 0.73   | 0.92    |
| GC     | rs4588     | T/G | 25  | 133 | 217 | 98 | 26 | 145 | 196 | 97 | 0.91     | 0.47   | 0.29    |
|        | rs7041     | A/C | 70  | 177 | 130 | 99 | 66 | 184 | 124 | 98 | 0.87     | 0.83   | 0.94    |
|        | rs2298849  | G/A | 15  | 126 | 204 | 90 | 25 | 113 | 227 | 96 | 0.04     |        |         |
| IL17A  | rs4711998  | A/G | 24  | 116 | 231 | 97 | 27 | 142 | 196 | 96 | 0.85     | 0.06   | 0.039   |
|        | rs3819024  | G/A | 48  | 179 | 144 | 97 | 47 | 162 | 155 | 96 | 0.65     | 0.55   | 0.45    |
|        | rs16882180 | T/C | 50  | 159 | 151 | 94 | 43 | 163 | 157 | 96 | 0.94     |        |         |
| IL17RA | rs2241043  | C/T | 57  | 180 | 137 | 98 | 68 | 163 | 145 | 99 | 0.065    | 0.36   | 0.86    |
|        | rs6518661  | A/G | 48  | 160 | 168 | 98 | 49 | 162 | 165 | 99 | 0.36     | 0.98   | 0.83    |
| IL21   | rs907715   | T/C | 41  | 139 | 168 | 91 | 50 | 158 | 157 | 96 | 0.31     |        |         |
|        | rs2221903  | C/T | 49  | 141 | 149 | 89 | 41 | 108 | 142 | 77 | 0.0078   |        |         |
| REL    | rs13017599 | A/G | 47  | 176 | 145 | 96 | 56 | 163 | 151 | 97 | 0.28     | 0.49   | 0.85    |
|        | rs13031237 | T/G | 9   | 28  | 67  | 27 | 51 | 150 | 142 | 90 | 0.27     |        |         |
| NFATC2 | rs959996   | A/G | 52  | 180 | 142 | 98 | 46 | 182 | 147 | 99 | 0.37     | 0.79   | 0.56    |
|        | rs2024582  | C/A | 52  | 185 | 135 | 97 | 52 | 180 | 144 | 99 | 0.72     | 0.85   | 0.66    |
|        | rs6021197  | G/T | 26  | 125 | 224 | 98 | 23 | 130 | 220 | 98 | 0.26     | 0.86   | 1       |
|        | rs761374   | C/T | 58  | 158 | 154 | 97 | 56 | 153 | 159 | 97 | 0.061    | 0.91   | 0.7     |
|        | rs2024581  | T/C | 24  | 138 | 202 | 95 | 24 | 106 | 222 | 93 | 0.029    |        |         |
|        | rs228832   | T/C | 23  | 143 | 206 | 97 | 22 | 138 | 215 | 99 | 0.1      | 0.86   | 0.61    |
|        | rs17728712 | A/G | 27  | 135 | 208 | 97 | 26 | 126 | 223 | 99 | 0.16     | 0.66   | 0.43    |
|        | rs228846   | C/T | 63  | 178 | 128 | 97 | 57 | 137 | 146 | 89 | 0.013    |        |         |
|        | rs228851   | T/G | 85  | 184 | 105 | 98 | 93 | 165 | 93  | 92 | 0.26     |        |         |
|        | rs6013193  | G/T | 85  | 176 | 111 | 97 | 73 | 165 | 124 | 95 | 0.18     | 0.4    | 0.18    |
|        | rs6123041  | A/T | 76  | 202 | 96  | 98 | 82 | 176 | 117 | 99 | 0.3      | 0.13   | 0.44    |
|        | rs3787189  | C/T | 39  | 160 | 175 | 98 | 36 | 161 | 169 | 96 | 0.79     | 0.93   | 0.99    |
|        | rs2273642  | A/G | 24  | 151 | 197 | 97 | 19 | 137 | 202 | 94 | 0.49     | 0.59   | 0.3     |

|                |                      |                                    |                |           |           |                          |                     |           |           |                          |            |                       |                     |
|----------------|----------------------|------------------------------------|----------------|-----------|-----------|--------------------------|---------------------|-----------|-----------|--------------------------|------------|-----------------------|---------------------|
|                | rs6067809            | T/C                                | 99             | 185       | 89        | 98                       | 92                  | 194       | 81        | 97                       | 0.27       | 0.67                  | 0.95                |
| <b>NFKB1</b>   | rs230487             | C/A                                | 24             | 148       | 197       | 97                       | 32                  | 155       | 181       | 97                       | 0.88       | 0.37                  | 0.17                |
|                | rs10026278           | T/C                                | 47             | 151       | 176       | 98                       | 34                  | 158       | 180       | 98                       | 0.94       | 0.32                  | 0.33                |
|                | rs230532             | T/A                                | 43             | 137       | 172       | 92                       | 33                  | 144       | 188       | 96                       | 0.48       |                       |                     |
|                | rs4648072            | G/A                                | 0              | 12        | 364       | 98                       | 0                   | 9         | 355       | 96                       | 0.81       | N/A                   | 0.56                |
|                | rs4698861            | G/A                                | 40             | 157       | 175       | 97                       | 32                  | 137       | 187       | 94                       | 0.34       |                       |                     |
|                | rs228611             | A/G                                | 66             | 189       | 115       | 97                       | 91                  | 185       | 97        | 98                       | 0.88       | 0.063                 | 0.024               |
| <b>RORA</b>    | rs1834336            | T/C                                | 59             | 161       | 155       | 98                       | 48                  | 171       | 148       | 97                       | 0.9        | 0.47                  | 0.75                |
|                | rs10519085           | C/T                                | 109            | 184       | 73        | 96                       | 101                 | 191       | 80        | 98                       | 0.56       | 0.7                   | 0.41                |
|                | rs1482058            | T/C                                | 98             | 172       | 86        | 93                       | 87                  | 187       | 89        | 96                       | 0.56       |                       |                     |
|                | rs1234805            | T/C                                | 52             | 173       | 145       | 97                       | 30                  | 160       | 179       | 97                       | 0.49       | 0.0068                | 0.00187             |
|                |                      |                                    |                |           |           |                          |                     |           |           |                          |            |                       |                     |
|                |                      |                                    | UK AAD (n=309) |           |           |                          | UK controls (n=335) |           |           |                          |            |                       |                     |
| <b>Gene</b>    | <b>RS identifier</b> | <b>minor/<br/>major<br/>allele</b> | <b>aa</b>      | <b>Aa</b> | <b>AA</b> | <b>Call<br/>rate (%)</b> | <b>aa</b>           | <b>Aa</b> | <b>AA</b> | <b>Call<br/>rate (%)</b> | <b>HWE</b> | <b>P<br/>genotype</b> | <b>P<br/>allele</b> |
| <b>CYP2R1</b>  | rs11023374           | C/T                                | 25             | 107       | 172       | 98                       | 25                  | 120       | 175       | 96                       | 0.49       | 0.84                  | 0.77                |
|                | rs1553006            | A/G                                | 68             | 136       | 98        | 98                       | 67                  | 150       | 80        | 89                       | 0.84       |                       |                     |
|                | rs10741661           | A/G                                | 66             | 148       | 95        | 100                      | 67                  | 168       | 93        | 98                       | 0.58       | 0.69                  | 0.79                |
| <b>TBX21</b>   | rs9910408            | G/A                                | 58             | 151       | 100       | 100                      | 66                  | 162       | 96        | 97                       | 0.88       | 0.73                  | 0.44                |
|                | rs11657388           | G/C                                | 22             | 95        | 183       | 97                       | 18                  | 103       | 198       | 95                       | 0.35       | 0.78                  | 0.57                |
| <b>RORC</b>    | rs3828057            | T/C                                | 73             | 146       | 90        | 100                      | 85                  | 161       | 79        | 97                       | 0.87       | 0.38                  | 0.2                 |
|                | rs12045886           | C/T                                | 19             | 118       | 142       | 90                       | 21                  | 106       | 167       | 88                       | 0.46       |                       |                     |
|                | rs1521177            | G/T                                | 65             | 142       | 91        | 96                       | 72                  | 146       | 105       | 96                       | 0.12       | 0.82                  | 0.8                 |
|                | rs7540530            | G/A                                | 68             | 141       | 82        | 94                       | 85                  | 147       | 96        | 98                       | 0.063      |                       |                     |
|                | rs949969             | A/G                                | 11             | 98        | 197       | 99                       | 21                  | 98        | 204       | 96                       | 0.056      | 0.25                  | 0.38                |
| <b>CYP24A1</b> | rs927650             | T/C                                | 81             | 145       | 82        | 100                      | 75                  | 156       | 99        | 99                       | 0.37       | 0.48                  | 0.23                |
|                | rs1570669            | G/A                                | 41             | 118       | 138       | 96                       | 43                  | 150       | 133       | 97                       | 0.94       | 0.27                  | 0.36                |
|                | rs2209314            | C/T                                | 13             | 98        | 189       | 97                       | 26                  | 110       | 176       | 93                       | 0.14       |                       |                     |
|                | rs3787555            | A/C                                | 25             | 104       | 176       | 99                       | 20                  | 132       | 177       | 98                       | 0.48       | 0.23                  | 0.72                |
|                | rs2762941            | A/G                                | 40             | 131       | 126       | 96                       | 51                  | 140       | 131       | 96                       | 0.19       | 0.7                   | 0.47                |
|                | rs2181874            | A/G                                | 16             | 111       | 182       | 100                      | 27                  | 116       | 183       | 97                       | 0.16       | 0.29                  | 0.23                |
|                | rs4809959            | G/A                                | 78             | 138       | 93        | 100                      | 87                  | 175       | 66        | 98                       | 0.2        | 0.012                 | 0.046               |
|                | rs4809960            | C/T                                | 18             | 103       | 183       | 98                       | 18                  | 116       | 182       | 94                       | 0.93       |                       |                     |
|                | rs2296241            | G/A                                | 86             | 143       | 77        | 99                       | 56                  | 170       | 90        | 94                       | 0.12       |                       |                     |
| <b>STAT2</b>   | rs2066808            | G/A                                | 0              | 31        | 266       | 96                       | 1                   | 55        | 269       | 97                       | 0.3        | 0.039                 | 0.012               |
|                | rs2066807            | G/C                                | 0              | 29        | 255       | 92                       | 0                   | 55        | 270       | 97                       | 0.26       |                       |                     |
| <b>VDR</b>     | rs2189480            | T/G                                | 41             | 151       | 116       | 100                      | 42                  | 155       | 132       | 98                       | 0.74       | 0.82                  | 0.57                |
|                | rs3819545            | G/A                                | 39             | 149       | 109       | 96                       | 57                  | 149       | 121       | 98                       | 0.34       | 0.29                  | 0.47                |

|         |            |     |    |     |     |     |    |     |     |    |          |        |        |
|---------|------------|-----|----|-----|-----|-----|----|-----|-----|----|----------|--------|--------|
|         | rs10875693 | A/T | 35 | 139 | 119 | 95  | 32 | 154 | 140 | 97 | 0.27     | 0.65   | 0.4    |
|         | rs11168275 | C/T | 14 | 132 | 163 | 100 | 17 | 116 | 192 | 97 | 0.92     | 0.19   | 0.23   |
|         | rs10735810 | A/G | 47 | 139 | 123 | 100 | 53 | 157 | 117 | 98 | 0.98     | 0.58   | 0.36   |
|         | rs2254210  | A/G | 39 | 151 | 119 | 100 | 46 | 163 | 112 | 96 | 0.28     | 0.6    | 0.32   |
| IL23A   | rs11171806 | A/G | 0  | 30  | 278 | 100 | 0  | 56  | 264 | 96 | 0.086    | N/A    | 0.0047 |
| CYP27B1 | rs10876994 | C/A | 14 | 89  | 200 | 98  | 19 | 118 | 172 | 92 | 0.84     |        |        |
|         | rs4646536  | G/A | 25 | 108 | 167 | 97  | 32 | 147 | 139 | 95 | 0.45     | 0.012  | 0.0091 |
|         | rs703842   | G/A | 26 | 115 | 168 | 100 | 34 | 149 | 142 | 97 | 0.58     | 0.027  | 0.014  |
| GATA3   | rs3802604  | G/A | 39 | 142 | 126 | 99  | 41 | 159 | 127 | 98 | 0.42     | 0.83   | 0.7    |
|         | rs570613   | C/T | 52 | 134 | 118 | 98  | 46 | 152 | 130 | 98 | 0.88     | 0.56   | 0.48   |
|         | rs569421   | C/T | 20 | 112 | 165 | 96  | 9  | 104 | 214 | 98 | 0.39     | 0.0092 | 0.003  |
|         | rs444929   | C/T | 10 | 108 | 189 | 99  | 26 | 128 | 173 | 98 | 0.73     | 0.012  | 0.0053 |
| IFIH1   | rs10930046 | C/T | 0  | 8   | 287 | 95  | 0  | 13  | 302 | 94 | 0.71     |        |        |
|         | rs13023380 | G/A | 62 | 160 | 75  | 96  | 81 | 160 | 87  | 98 | 0.66     | 0.39   | 0.65   |
|         | rs3747517  | T/C | 17 | 139 | 152 | 100 | 26 | 133 | 166 | 97 | 0.93     | 0.34   | 0.88   |
| STAT4   | rs925847   | T/C | 27 | 108 | 157 | 94  | 35 | 121 | 158 | 94 | 0.11     |        |        |
|         | rs3821236  | A/G | 14 | 91  | 198 | 98  | 12 | 109 | 193 | 94 | 0.48     |        |        |
|         | rs16833260 | G/C | 33 | 137 | 138 | 100 | 43 | 139 | 141 | 96 | 0.35     | 0.6    | 0.42   |
|         | rs3024866  | G/A | 19 | 123 | 166 | 100 | 26 | 127 | 167 | 96 | 0.79     | 0.56   | 0.32   |
|         | rs1517352  | A/C | 43 | 142 | 114 | 97  | 48 | 143 | 123 | 94 | 0.55     |        |        |
|         | rs10931481 | G/A | 30 | 137 | 141 | 100 | 38 | 137 | 141 | 94 | 0.6      |        |        |
|         | rs4274624  | C/T | 17 | 113 | 179 | 100 | 19 | 113 | 193 | 97 | 0.65     | 0.97   | 0.98   |
|         | rs16833215 | G/A | 32 | 115 | 161 | 100 | 29 | 138 | 162 | 98 | 0.96     | 0.44   | 0.55   |
|         | rs4853543  | A/G | 50 | 0   | 246 | 96  | 48 | 0   | 267 | 94 | 0.000001 |        |        |
|         | rs11685878 | T/C | 46 | 134 | 117 | 96  | 57 | 159 | 99  | 94 | 0.62     |        |        |
|         | rs4853546  | A/G | 34 | 122 | 150 | 99  | 39 | 142 | 134 | 94 | 0.88     |        |        |
| GC      | rs4588     | T/G | 28 | 126 | 144 | 96  | 31 | 123 | 175 | 98 | 0.17     | 0.43   | 0.36   |
|         | rs7041     | A/C | 57 | 155 | 97  | 100 | 54 | 169 | 101 | 97 | 0.24     | 0.81   | 0.77   |
|         | rs2298849  | G/A | 6  | 88  | 214 | 100 | 9  | 94  | 211 | 94 | 0.7      |        |        |
| IL17A   | rs4711998  | A/G | 17 | 107 | 174 | 96  | 15 | 138 | 174 | 98 | 0.057    | 0.26   | 0.39   |
|         | rs3819024  | G/A | 34 | 137 | 127 | 96  | 40 | 158 | 122 | 96 | 0.31     | 0.52   | 0.3    |
|         | rs16882180 | T/C | 26 | 143 | 133 | 98  | 40 | 166 | 122 | 98 | 0.15     | 0.13   | 0.043  |
| IL17RA  | rs2241043  | C/T | 42 | 147 | 120 | 100 | 60 | 137 | 132 | 98 | 0.023    | 0.18   | 0.55   |
|         | rs6518661  | A/G | 36 | 129 | 144 | 100 | 43 | 150 | 134 | 98 | 0.92     | 0.35   | 0.19   |
| IL21    | rs907715   | T/C | 37 | 122 | 148 | 99  | 47 | 159 | 120 | 97 | 0.63     | 0.015  | 0.012  |
|         | rs2221903  | C/T | 31 | 114 | 133 | 90  | 23 | 114 | 167 | 91 | 0.56     |        |        |
| REL     | rs13017599 | A/G | 48 | 155 | 104 | 99  | 30 | 158 | 142 | 99 | 0.4      | 0.0099 | 0.0028 |
|         | rs13031237 | T/G | 44 | 136 | 104 | 92  | 28 | 154 | 140 | 96 | 0.11     |        |        |
| NFATC2  | rs959996   | A/G | 43 | 146 | 117 | 99  | 62 | 146 | 116 | 97 | 0.19     | 0.23   | 0.18   |

|         | rs2024582     | C/A                       | 49                  | 142 | 114 | 99               | 56                       | 145 | 112 | 93               | 0.45  |               |             |
|---------|---------------|---------------------------|---------------------|-----|-----|------------------|--------------------------|-----|-----|------------------|-------|---------------|-------------|
|         | rs6021197     | G/T                       | 12                  | 115 | 182 | 100              | 19                       | 110 | 195 | 97               | 0.51  | 0.41          | 0.88        |
|         | rs761374      | C/T                       | 47                  | 131 | 130 | 100              | 59                       | 136 | 130 | 97               | 0.029 | 0.61          | 0.37        |
|         | rs2024581     | T/C                       | 20                  | 109 | 174 | 98               | 29                       | 113 | 168 | 93               | 0.12  |               |             |
|         | rs228832      | T/C                       | 21                  | 108 | 177 | 99               | 21                       | 129 | 176 | 97               | 0.68  | 0.54          | 0.49        |
|         | rs17728712    | A/G                       | 16                  | 118 | 172 | 99               | 24                       | 128 | 162 | 94               | 0.85  |               |             |
|         | rs228846      | C/T                       | 52                  | 155 | 101 | 100              | 69                       | 154 | 100 | 96               | 0.5   | 0.36          | 0.26        |
|         | rs228851      | T/G                       | 77                  | 150 | 82  | 100              | 73                       | 150 | 102 | 97               | 0.21  | 0.39          | 0.2         |
|         | rs6013193     | G/T                       | 65                  | 124 | 86  | 89               | 85                       | 151 | 90  | 97               | 0.19  |               |             |
|         | rs6123041     | A/T                       | 77                  | 145 | 84  | 99               | 71                       | 145 | 100 | 94               | 0.19  |               |             |
|         | rs3787189     | C/T                       | 33                  | 140 | 136 | 100              | 39                       | 121 | 163 | 96               | 0.029 | 0.13          | 0.35        |
|         | rs2273642     | A/G                       | 24                  | 122 | 150 | 96               | 27                       | 121 | 178 | 97               | 0.32  | 0.57          | 0.47        |
|         | rs6067809     | T/C                       | 68                  | 127 | 102 | 96               | 80                       | 163 | 85  | 98               | 0.92  | 0.065         | 0.089       |
| NFKB1   | rs230487      | C/A                       | 24                  | 118 | 164 | 99               | 21                       | 136 | 173 | 99               | 0.4   | 0.67          | 0.95        |
|         | rs10026278    | T/C                       | 26                  | 114 | 169 | 100              | 41                       | 142 | 140 | 96               | 0.6   | 0.012         | 0.0034      |
|         | rs230532      | T/A                       | 28                  | 127 | 149 | 98               | 57                       | 146 | 124 | 98               | 0.27  | 0.0016        | 0.0004      |
|         | rs4648072     | G/A                       | 0                   | 4   | 291 | 95               | 0                        | 3   | 323 | 97               | 0.93  | N/A           | 0.61        |
|         | rs4698861     | G/A                       | 22                  | 125 | 161 | 100              | 45                       | 150 | 126 | 96               | 0.97  | 0.0002        | 0.0008      |
|         | rs228611      | A/G                       | 74                  | 154 | 80  | 100              | 68                       | 147 | 109 | 97               | 0.16  | 0.11          | 0.062       |
| RORA    | rs1834336     | T/C                       | 36                  | 125 | 136 | 96               | 41                       | 146 | 141 | 98               | 0.74  | 0.78          | 0.56        |
|         | rs10519085    | C/T                       | 77                  | 145 | 84  | 99               | 95                       | 157 | 77  | 98               | 0.44  | 0.4           | 0.18        |
|         | rs1482058     | T/C                       | 72                  | 151 | 73  | 96               | 79                       | 168 | 79  | 97               | 0.58  | 0.99          | 0.95        |
|         | rs1234805     | T/C                       | 27                  | 137 | 139 | 98               | 37                       | 162 | 130 | 98               | 0.2   | 0.24          | 0.093       |
|         |               |                           |                     |     |     |                  |                          |     |     |                  |       |               |             |
| PHASE 2 |               |                           | Germany AAD (n=341) |     |     |                  | Germany controls (n=235) |     |     |                  |       |               |             |
| Gene    | RS identifier | minor/<br>major<br>allele | aa                  | Aa  | AA  | Call<br>rate (%) | aa                       | Aa  | AA  | Call<br>rate (%) | HWE   | P<br>genotype | P<br>allele |
| REL     | rs13017599    | A/G                       | 45                  | 170 | 118 | 98               | 28                       | 109 | 95  | 99               | 0.7   | 0.41          | 0.24        |
| STAT4   | rs10931481    | G/A                       | 33                  | 145 | 155 | 98               | 23                       | 90  | 114 | 97               | 0.41  | 0.65          | 0.54        |
|         | rs4274624     | C/T                       | 15                  | 122 | 195 | 97               | 9                        | 81  | 141 | 98               | 0.53  | 0.84          | 0.56        |
|         | rs4853543     | A/G                       | 40                  | 159 | 129 | 96               | 24                       | 120 | 83  | 97               | 0.044 | 0.58          | 0.85        |
| NFKB1   | rs10026278    | T/C                       | 33                  | 133 | 166 | 97               | 24                       | 95  | 113 | 99               | 0.55  | 0.95          | 0.76        |
|         | rs230532      | T/A                       | 34                  | 150 | 149 | 98               | 29                       | 101 | 102 | 99               | 0.61  | 0.69          | 0.59        |
|         | rs4698861     | G/A                       | 29                  | 146 | 158 | 98               | 24                       | 101 | 106 | 98               | 0.99  | 0.79          | 0.56        |
| IL21    | rs907715      | T/C                       | 14                  | 133 | 184 | 97               | 25                       | 90  | 113 | 97               | 0.27  | 0.0078        | 0.018       |
|         | rs2221903     | C/T                       | 54                  | 157 | 122 | 98               | 36                       | 93  | 101 | 98               | 0.066 | 0.2           | 0.18        |
| IL17A   | rs3819024     | G/A                       | 46                  | 139 | 147 | 97               | 44                       | 89  | 98  | 98               | 0.005 |               |             |

|                |                      |                                    |                   |           |           |                          |                        |           |           |                          |            |                       |                     |
|----------------|----------------------|------------------------------------|-------------------|-----------|-----------|--------------------------|------------------------|-----------|-----------|--------------------------|------------|-----------------------|---------------------|
|                | rs4711998            | A/G                                | 23                | 128       | 182       | 98                       | 13                     | 86        | 132       | 98                       | 0.84       | 0.76                  | 0.47                |
| <b>GATA3</b>   | rs569421             | C/T                                | 25                | 119       | 189       | 98                       | 17                     | 81        | 133       | 98                       | 0.34       | 0.98                  | 0.85                |
|                | rs3802604            | G/A                                | 52                | 143       | 137       | 97                       | 40                     | 100       | 91        | 98                       | 0.17       | 0.84                  | 0.55                |
|                | rs444929             | C/T                                | 13                | 106       | 213       | 97                       | 20                     | 69        | 140       | 97                       | 0.01       | 0.06                  | 0.12                |
| <b>IL23A</b>   | rs11171806           | A/G                                | 0                 | 40        | 293       | 98                       | 1                      | 39        | 190       | 98                       | 0.5        | 0.12                  | 0.06                |
| <b>STAT2</b>   | rs2066808            | G/A                                | 1                 | 41        | 291       | 98                       | 1                      | 40        | 190       | 98                       | 0.47       | 0.27                  | 0.1                 |
|                | rs2066807            | G/C                                | 0                 | 40        | 293       | 98                       | 1                      | 39        | 191       | 98                       | 0.51       | 0.12                  | 0.07                |
| <b>CYP27B1</b> | rs10876994           | C/A                                | 22                | 122       | 184       | 96                       | 16                     | 83        | 129       | 97                       | 0.6        | 0.98                  | 0.97                |
|                | rs4646536            | G/A                                | 34                | 138       | 161       | 98                       | 27                     | 95        | 108       | 98                       | 0.39       | 0.84                  | 0.6                 |
| <b>RORA</b>    | rs1234805            | T/C                                | 31                | 144       | 157       | 97                       | 28                     | 95        | 108       | 98                       | 0.32       | 0.55                  | 0.56                |
| <b>CYP24A1</b> | rs4809959            | G/A                                | 75                | 165       | 92        | 97                       | 58                     | 119       | 54        | 98                       | 0.64       | 0.49                  | 0.26                |
|                |                      |                                    |                   |           |           |                          |                        |           |           |                          |            |                       |                     |
|                |                      |                                    | Italy AAD (n=280) |           |           |                          | Italy controls (n=322) |           |           |                          |            |                       |                     |
| <b>Gene</b>    | <b>RS identifier</b> | <b>minor/<br/>major<br/>allele</b> | <b>aa</b>         | <b>Aa</b> | <b>AA</b> | <b>Call<br/>rate (%)</b> | <b>aa</b>              | <b>Aa</b> | <b>AA</b> | <b>Call<br/>rate (%)</b> | <b>HWE</b> | <b>P<br/>genotype</b> | <b>P<br/>allele</b> |
| <b>REL</b>     | rs13017599           | A/G                                | 32                | 138       | 105       | 98                       | 36                     | 133       | 152       | 100                      | 0.4        | 0.067                 | 0.082               |
| <b>STAT4</b>   | rs10931481           | G/A                                | 41                | 117       | 117       | 98                       | 26                     | 132       | 163       | 100                      | 0.92       | 0.016                 | 0.0056              |
|                | rs4274624            | C/T                                | 22                | 108       | 146       | 99                       | 14                     | 112       | 196       | 100                      | 0.69       | 0.059                 | 0.02                |
|                | rs4853543            | A/G                                | 51                | 132       | 89        | 97                       | 59                     | 154       | 108       | 100                      | 0.75       | 0.97                  | 0.82                |
| <b>NFKB1</b>   | rs10026278           | T/C                                | 27                | 95        | 153       | 98                       | 15                     | 116       | 191       | 100                      | 0.62       | 0.049                 | 0.078               |
|                | rs230532             | T/A                                | 34                | 118       | 124       | 99                       | 27                     | 130       | 164       | 100                      | 0.86       | 0.17                  | 0.061               |
|                | rs4698861            | G/A                                | 36                | 97        | 142       | 98                       | 26                     | 112       | 180       | 99                       | 0.15       | 0.13                  | 0.059               |
| <b>IL21</b>    | rs907715             | T/C                                | 34                | 121       | 119       | 98                       | 33                     | 144       | 145       | 100                      | 0.75       | 0.7                   | 0.49                |
|                | rs2221903            | C/T                                | 21                | 109       | 147       | 99                       | 24                     | 126       | 171       | 100                      | 0.91       | 1                     | 0.95                |
| <b>IL17A</b>   | rs3819024            | G/A                                | 32                | 124       | 120       | 99                       | 37                     | 130       | 154       | 100                      | 0.24       | 0.51                  | 0.4                 |
|                | rs4711998            | A/G                                | 22                | 98        | 156       | 99                       | 22                     | 115       | 185       | 100                      | 0.48       | 0.87                  | 0.68                |
| <b>GATA3</b>   | rs569421             | C/T                                | 17                | 113       | 147       | 99                       | 27                     | 126       | 169       | 100                      | 0.61       | 0.57                  | 0.58                |
|                | rs3802604            | G/A                                | 38                | 138       | 99        | 98                       | 47                     | 151       | 123       | 100                      | 0.95       | 0.75                  | 0.79                |
|                | rs444929             | C/T                                | 9                 | 83        | 186       | 99                       | 11                     | 69        | 241       | 100                      | 0.037      | 0.063                 | 0.06                |
| <b>IL23A</b>   | rs11171806           | A/G                                | 2                 | 31        | 241       | 98                       | 0                      | 18        | 303       | 100                      | 0.61       | 0.012                 | 0.0028              |
| <b>STAT2</b>   | rs2066808            | G/A                                | 3                 | 31        | 243       | 99                       | 0                      | 23        | 298       | 100                      | 0.51       | 0.037                 | 0.014               |
|                | rs2066807            | G/C                                | 2                 | 31        | 244       | 99                       | 0                      | 19        | 297       | 98                       | 0.58       | 0.023                 | 0.0063              |
| <b>CYP27B1</b> | rs10876994           | C/A                                | 10                | 98        | 170       | 99                       | 17                     | 102       | 202       | 100                      | 0.39       | 0.46                  | 0.99                |

|                |                      |                                    |                    |           |           |                          |                         |           |           |                          |            |                       |                     |
|----------------|----------------------|------------------------------------|--------------------|-----------|-----------|--------------------------|-------------------------|-----------|-----------|--------------------------|------------|-----------------------|---------------------|
|                | <b>rs4646536</b>     | G/A                                | 14                 | 109       | 152       | 98                       | 18                      | 127       | 177       | 100                      | 0.44       | 0.96                  | 0.87                |
| <b>RORA</b>    | rs1234805            | T/C                                | 18                 | 95        | 165       | 99                       | 18                      | 105       | 199       | 100                      | 0.4        | 0.8                   | 0.49                |
| <b>CYP24A1</b> | rs4809959            | G/A                                | 80                 | 145       | 52        | 99                       | 93                      | 159       | 68        | 99                       | 1          | 0.72                  | 0.69                |
|                |                      |                                    |                    |           |           |                          |                         |           |           |                          |            |                       |                     |
|                |                      |                                    | Poland AAD (n=275) |           |           |                          | Poland controls (n=296) |           |           |                          |            |                       |                     |
| <b>Gene</b>    | <b>RS identifier</b> | <b>minor/<br/>major<br/>allele</b> | <b>aa</b>          | <b>Aa</b> | <b>AA</b> | <b>Call<br/>rate (%)</b> | <b>aa</b>               | <b>Aa</b> | <b>AA</b> | <b>Call<br/>rate (%)</b> | <b>HWE</b> | <b>P<br/>genotype</b> | <b>P<br/>allele</b> |
| <b>REL</b>     | rs13017599           | A/G                                | 40                 | 119       | 110       | 98                       | 47                      | 113       | 131       | 98                       | 0.0091     |                       |                     |
| <b>STAT4</b>   | rs10931481           | G/A                                | 33                 | 111       | 126       | 98                       | 25                      | 118       | 151       | 99                       | 0.76       | 0.28                  | 0.13                |
|                | rs4274624            | C/T                                | 21                 | 98        | 151       | 98                       | 18                      | 93        | 184       | 100                      | 0.18       | 0.28                  | 0.11                |
|                | rs4853543            | A/G                                | 28                 | 124       | 117       | 98                       | 36                      | 113       | 146       | 100                      | 0.058      | 0.17                  | 0.45                |
| <b>NFKB1</b>   | rs10026278           | T/C                                | 22                 | 117       | 129       | 97                       | 34                      | 139       | 120       | 99                       | 0.51       | 0.16                  | 0.06                |
|                | rs230532             | T/A                                | 27                 | 112       | 131       | 98                       | 37                      | 121       | 138       | 100                      | 0.2        | 0.64                  | 0.43                |
|                | rs4698861            | G/A                                | 24                 | 110       | 129       | 96                       | 33                      | 111       | 147       | 98                       | 0.092      | 0.55                  | 0.89                |
| <b>IL21</b>    | rs907715             | T/C                                | 26                 | 97        | 147       | 98                       | 19                      | 114       | 162       | 100                      | 0.86       | 0.35                  | 0.49                |
|                | rs2221903            | C/T                                | 27                 | 111       | 128       | 97                       | 37                      | 147       | 110       | 99                       | 0.26       | 0.04                  | 0.02                |
| <b>IL17A</b>   | rs3819024            | G/A                                | 57                 | 124       | 89        | 98                       | 54                      | 150       | 92        | 100                      | 0.6        | 0.5                   | 0.87                |
|                | rs4711998            | A/G                                | 22                 | 95        | 153       | 98                       | 14                      | 102       | 179       | 100                      | 0.91       | 0.23                  | 0.14                |
| <b>GATA3</b>   | rs569421             | C/T                                | 15                 | 89        | 166       | 98                       | 18                      | 110       | 167       | 100                      | 0.98       | 0.5                   | 0.28                |
|                | rs3802604            | G/A                                | 30                 | 107       | 131       | 97                       | 37                      | 141       | 117       | 100                      | 0.58       | 0.09                  | 0.06                |
|                | rs444929             | C/T                                | 13                 | 69        | 188       | 98                       | 10                      | 106       | 180       | 100                      | 0.24       | 0.03                  | 0.12                |
| <b>IL23A</b>   | rs11171806           | A/G                                | 2                  | 53        | 214       | 98                       | 1                       | 52        | 241       | 99                       | 0.3        | 0.84                  | 0.43                |
| <b>STAT2</b>   | rs2066808            | G/A                                | 2                  | 53        | 214       | 98                       | 1                       | 54        | 241       | 100                      | 0.26       | 0.72                  | 0.53                |
|                | rs2066807            | G/C                                | 2                  | 53        | 215       | 98                       | 1                       | 52        | 243       | 100                      | 0.31       | 0.65                  | 0.42                |
| <b>CYP27B1</b> | rs10876994           | C/A                                | 22                 | 102       | 145       | 98                       | 28                      | 120       | 146       | 99                       | 0.64       | 0.58                  | 0.3                 |
|                | <b>rs4646536</b>     | G/A                                | 30                 | 115       | 125       | 98                       | 39                      | 132       | 124       | 100                      | 0.68       | 0.54                  | 0.26                |
| <b>RORA</b>    | rs1234805            | T/C                                | 47                 | 123       | 100       | 98                       | 56                      | 142       | 97        | 100                      | 0.75       | 0.58                  | 0.33                |
| <b>CYP24A1</b> | rs4809959            | G/A                                | 86                 | 129       | 55        | 98                       | 74                      | 143       | 78        | 100                      | 0.6        | 0.11                  | 0.03                |
|                |                      |                                    |                    |           |           |                          |                         |           |           |                          |            |                       |                     |
|                |                      |                                    | Sweden AAD (n=368) |           |           |                          | Sweden controls (n=368) |           |           |                          |            |                       |                     |
| <b>Gene</b>    | <b>RS identifier</b> | <b>minor/<br/>major<br/>allele</b> | <b>aa</b>          | <b>Aa</b> | <b>AA</b> | <b>Call<br/>rate (%)</b> | <b>aa</b>               | <b>Aa</b> | <b>AA</b> | <b>Call<br/>rate (%)</b> | <b>HWE</b> | <b>P<br/>genotype</b> | <b>P<br/>allele</b> |
| <b>REL</b>     | rs13017599           | A/G                                | 53                 | 180       | 135       | 100                      | 50                      | 164       | 152       | 99                       | 0.59       | 0.4                   | 0.27                |

|                |                      |                                    |                |           |           |                          |                     |           |           |                          |            |                       |                     |
|----------------|----------------------|------------------------------------|----------------|-----------|-----------|--------------------------|---------------------|-----------|-----------|--------------------------|------------|-----------------------|---------------------|
| <b>STAT4</b>   | rs10931481           | G/A                                | 55             | 158       | 155       | 100                      | 41                  | 151       | 172       | 99                       | 0.37       | 0.22                  | 0.08                |
|                | rs4274624            | C/T                                | 35             | 144       | 189       | 100                      | 21                  | 130       | 214       | 99                       | 0.83       | 0.056                 | 0.017               |
|                | rs4853543            | A/G                                | 53             | 177       | 138       | 100                      | 53                  | 172       | 139       | 99                       | 0.96       | 0.97                  | 0.92                |
| <b>NFKB1</b>   | rs10026278           | T/C                                | 30             | 147       | 191       | 100                      | 30                  | 169       | 168       | 100                      | 0.16       | 0.22                  | 0.2                 |
|                | rs230532             | T/A                                | 32             | 152       | 184       | 100                      | 29                  | 177       | 160       | 99                       | 0.036      | 0.16                  | 0.25                |
|                | rs4698861            | G/A                                | 34             | 160       | 173       | 100                      | 31                  | 172       | 163       | 99                       | 0.12       | 0.65                  | 0.71                |
| <b>IL21</b>    | rs907715             | T/C                                | 35             | 156       | 177       | 100                      | 24                  | 151       | 189       | 99                       | 0.4        | 0.29                  | 0.16                |
|                | rs2221903            | C/T                                | 45             | 186       | 137       | 100                      | 46                  | 165       | 153       | 99                       | 0.88       | 0.35                  | 0.38                |
| <b>IL17A</b>   | rs3819024            | G/A                                | 50             | 172       | 146       | 100                      | 46                  | 172       | 147       | 99                       | 0.69       | 0.92                  | 0.75                |
|                | rs4711998            | A/G                                | 16             | 140       | 212       | 100                      | 31                  | 135       | 199       | 99                       | 0.24       | 0.07                  | 0.11                |
| <b>GATA3</b>   | rs569421             | C/T                                | 23             | 132       | 213       | 100                      | 20                  | 141       | 204       | 99                       | 0.49       | 0.71                  | 0.79                |
|                | rs3802604            | G/A                                | 51             | 164       | 153       | 100                      | 59                  | 158       | 148       | 99                       | 0.13       | 0.68                  | 0.51                |
|                | rs444929             | C/T                                | 16             | 119       | 232       | 100                      | 18                  | 122       | 225       | 99                       | 0.78       | 0.88                  | 0.62                |
| <b>IL23A</b>   | rs11171806           | A/G                                | 1              | 57        | 310       | 100                      | 2                   | 45        | 317       | 99                       | 0.77       | 0.41                  | 0.35                |
| <b>STAT2</b>   | rs2066808            | G/A                                | 1              | 58        | 309       | 100                      | 2                   | 49        | 316       | 100                      | 0.95       | 0.56                  | 0.5                 |
|                | rs2066807            | G/C                                | 1              | 57        | 310       | 100                      | 2                   | 47        | 317       | 99                       | 0.86       | 0.5                   | 0.45                |
| <b>CYP27B1</b> | rs10876994           | C/A                                | 23             | 152       | 193       | 100                      | 28                  | 171       | 165       | 99                       | 0.17       | 0.31                  | 0.14                |
|                | rs4646536            | G/A                                | 41             | 173       | 154       | 100                      | 38                  | 181       | 142       | 98                       | 0.076      | 0.7                   | 0.7                 |
| <b>RORA</b>    | rs1234805            | T/C                                | 43             | 173       | 152       | 100                      | 50                  | 168       | 148       | 99                       | 0.83       | 0.72                  | 0.57                |
| <b>CYP24A1</b> | rs4809959            | G/A                                | 91             | 177       | 100       | 100                      | 78                  | 173       | 113       | 99                       | 0.44       | 0.4                   | 0.17                |
|                |                      |                                    |                |           |           |                          |                     |           |           |                          |            |                       |                     |
| <b>PHASE 3</b> |                      |                                    | UK AAD (n=335) |           |           |                          | UK controls (n=302) |           |           |                          |            |                       |                     |
| <b>Gene</b>    | <b>RS identifier</b> | <b>minor/<br/>major<br/>allele</b> | <b>aa</b>      | <b>Aa</b> | <b>AA</b> | <b>Call<br/>rate (%)</b> | <b>aa</b>           | <b>Aa</b> | <b>AA</b> | <b>Call<br/>rate (%)</b> | <b>HWE</b> | <b>P<br/>genotype</b> | <b>P<br/>allele</b> |
| <b>GATA3</b>   | rs1244181            | A/G                                | 10             | 105       | 215       | 99                       | 19                  | 90        | 188       | 98                       | 0.074      | 0.13                  | 0.25                |
|                | rs2275806            | G/A                                | 43             | 165       | 113       | 96                       | 64                  | 133       | 97        | 97                       | 0.15       | 0.022                 | 0.06                |
|                | rs2229359            | T/C                                | 0              | 53        | 247       | 90                       | 3                   | 41        | 256       | 99                       | 0.2        |                       |                     |
|                | rs3781094            | A/C                                | 33             | 148       | 147       | 98                       | 39                  | 120       | 137       | 98                       | 0.12       | 0.34                  | 0.76                |
|                | rs3802604            | G/A                                | 45             | 157       | 132       | 100                      | 51                  | 119       | 127       | 98                       | 0.014      | 0.17                  | 0.93                |
|                | rs570613             | C/T                                | 59             | 146       | 125       | 99                       | 53                  | 120       | 127       | 99                       | 0.01       | 0.48                  | 0.4                 |
|                | rs569421             | C/T                                | 21             | 132       | 182       | 100                      | 13                  | 93        | 194       | 99                       | 0.66       | 0.029                 | 0.0096              |
|                | rs444929             | C/T                                | 11             | 115       | 209       | 100                      | 25                  | 106       | 169       | 99                       | 0.16       | 0.017                 | 0.019               |
|                | rs422628             | C/T                                | 13             | 126       | 188       | 98                       | 28                  | 111       | 148       | 95                       | 0.29       | 0.013                 | 0.01                |

|       |               |                           |                    |     |     |                  |                          |     |      |                  |       |               |             |
|-------|---------------|---------------------------|--------------------|-----|-----|------------------|--------------------------|-----|------|------------------|-------|---------------|-------------|
|       | rs406103      | T/C                       | 19                 | 125 | 190 | 100              | 11                       | 92  | 194  | 98               | 0.98  | 0.08          | 0.026       |
|       | rs10905284    | C/A                       | 76                 | 147 | 111 | 100              | 68                       | 135 | 97   | 99               | 0.11  | 0.96          | 0.88        |
|       | rs2229360     | T/C                       | 0                  | 2   | 332 | 100              | 0                        | 3   | 298  | 100              | 0.93  | N/A           | 0.57        |
|       | rs9746        | G/A                       | 10                 | 79  | 233 | 96               | 3                        | 62  | 230  | 98               | 0.6   | 0.097         | 0.048       |
|       | rs1058240     | G/A                       | 11                 | 110 | 209 | 99               | 23                       | 98  | 178  | 99               | 0.073 | 0.052         | 0.081       |
|       | rs12412241    | A/G                       | 26                 | 127 | 179 | 99               | 24                       | 114 | 161  | 99               | 0.45  | 0.97          | 0.88        |
|       |               |                           |                    |     |     |                  |                          |     |      |                  |       |               |             |
|       |               |                           | UK GD (n=283)      |     |     |                  | UK controls (n=302)      |     |      |                  |       |               |             |
| Gene  | RS identifier | minor/<br>major<br>allele | aa                 | Aa  | AA  | Call<br>rate (%) | aa                       | Aa  | AA   | Call<br>rate (%) | HWE   | P<br>genotype | P<br>allele |
| GATA3 | rs1244181     | A/G                       | 9                  | 89  | 176 | 97               | 19                       | 90  | 188  | 98               | 0.074 | 0.22          | 0.4         |
|       | rs2275806     | G/A                       | 59                 | 123 | 97  | 99               | 64                       | 133 | 97   | 97               | 0.15  | 0.96          | 0.8         |
|       | rs2229359     | T/C                       | 0                  | 46  | 224 | 95               | 3                        | 41  | 256  | 99               | 0.2   | 0.15          | 0.67        |
|       | rs3781094     | A/C                       | 34                 | 124 | 122 | 99               | 39                       | 120 | 137  | 98               | 0.12  | 0.77          | 0.76        |
|       | rs3802604     | G/A                       | 43                 | 128 | 111 | 100              | 51                       | 119 | 127  | 98               | 0.014 | 0.43          | 0.8         |
|       | rs570613      | C/T                       | 44                 | 142 | 90  | 98               | 53                       | 120 | 127  | 99               | 0.01  | 0.018         | 0.17        |
|       | rs569421      | C/T                       | 17                 | 108 | 151 | 98               | 13                       | 93  | 194  | 99               | 0.66  | 0.049         | 0.017       |
|       | rs444929      | C/T                       | 19                 | 93  | 162 | 97               | 25                       | 106 | 169  | 99               | 0.16  | 0.73          | 0.41        |
|       | rs422628      | C/T                       | 21                 | 104 | 144 | 95               | 28                       | 111 | 148  | 95               | 0.29  | 0.7           | 0.47        |
|       | rs406103      | T/C                       | 17                 | 96  | 168 | 99               | 11                       | 92  | 194  | 98               | 0.98  | 0.25          | 0.1         |
|       | rs10905284    | C/A                       | 60                 | 139 | 78  | 98               | 68                       | 135 | 97   | 99               | 0.11  | 0.43          | 0.59        |
|       | rs2229360     | T/C                       | 0                  | 5   | 271 | 98               | 0                        | 3   | 298  | 100              | 0.93  | N/A           | 0.4         |
|       | rs9746        | G/A                       | 8                  | 63  | 181 | 89               | 3                        | 62  | 230  | 98               | 0.6   |               |             |
|       | rs1058240     | G/A                       | 12                 | 95  | 168 | 97               | 23                       | 98  | 178  | 99               | 0.073 | 0.25          | 0.33        |
|       | rs12412241    | A/G                       | 24                 | 111 | 142 | 98               | 24                       | 114 | 161  | 99               | 0.45  | 0.85          | 0.61        |
|       |               |                           |                    |     |     |                  |                          |     |      |                  |       |               |             |
|       |               |                           | Norway AAD (n=352) |     |     |                  | Norway controls (n=1353) |     |      |                  |       |               |             |
| Gene  | RS identifier | minor/<br>major<br>allele | aa                 | Aa  | AA  | Call<br>rate (%) | aa                       | Aa  | AA   | Call<br>rate (%) | HWE   | P<br>genotype | P<br>allele |
| GATA3 | rs1244181     | A/G                       | 13                 | 103 | 231 | 99               | 44                       | 387 | 920  | 100              | 0.67  | 0.82          | 0.54        |
|       | rs2275806     | G/A                       | 61                 | 159 | 128 | 99               | 220                      | 562 | 402  | 88               | 0.34  |               |             |
|       | rs2229359     | T/C                       | 0                  | 44  | 305 | 99               | 10                       | 154 | 1167 | 98               | 0.053 | 0.24          | 0.82        |

[illegible]

|       |               |                           | New Zealand RA (n=650) |     |     |                  | New Zealand controls (n=452) |     |     |                  |          |               |             |
|-------|---------------|---------------------------|------------------------|-----|-----|------------------|------------------------------|-----|-----|------------------|----------|---------------|-------------|
| Gene  | RS identifier | minor/<br>major<br>allele | aa                     | Aa  | AA  | Call<br>rate (%) | aa                           | Aa  | AA  | Call<br>rate (%) | HWE      | P<br>genotype | P<br>allele |
| GATA3 | rs1244181     | A/G                       | 25                     | 207 | 414 | 99               | 11                           | 150 | 279 | 97               | 0.078    | 0.4           | 0.84        |
|       | rs2275806     | G/A                       | 138                    | 299 | 196 | 97               | 82                           | 204 | 153 | 97               | 0.34     | 0.29          | 0.11        |
|       | rs2229359     | T/C                       | 0                      | 89  | 557 | 99               | 2                            | 62  | 377 | 98               | 0.75     | 0.23          | 0.6         |
|       | rs3781094     | A/C                       | 91                     | 291 | 255 | 98               | 46                           | 197 | 194 | 97               | 0.7      | 0.13          | 0.053       |
|       | rs3802604     | G/A                       | 109                    | 298 | 233 | 98               | 53                           | 201 | 187 | 98               | 0.93     | 0.033         | 0.0096      |
|       | rs570613      | C/T                       | 112                    | 291 | 241 | 99               | 63                           | 200 | 175 | 97               | 0.63     | 0.39          | 0.19        |
|       | rs569421      | C/T                       | 36                     | 237 | 372 | 99               | 13                           | 161 | 267 | 98               | 0.052    | 0.11          | 0.13        |
|       | rs444929      | C/T                       | 39                     | 230 | 379 | 100              | 20                           | 151 | 270 | 98               | 0.85     | 0.52          | 0.28        |
|       | rs422628      | C/T                       | 44                     | 257 | 343 | 99               | 24                           | 159 | 254 | 97               | 0.89     | 0.26          | 0.1         |
|       | rs406103      | T/C                       | 33                     | 221 | 390 | 99               | 12                           | 157 | 274 | 98               | 0.058    | 0.14          | 0.3         |
|       | rs10905284    | C/A                       | 139                    | 311 | 196 | 99               | 76                           | 220 | 145 | 98               | 0.63     | 0.21          | 0.12        |
|       | rs2229360     | T/C                       | 1                      | 19  | 628 | 100              | 0                            | 5   | 437 | 98               | 0.9      | 0.098         | 0.026       |
|       | rs9746        | G/A                       | 20                     | 89  | 446 | 85               | 10                           | 43  | 293 | 77               | 0.000004 |               |             |
|       | rs1058240     | G/A                       | 33                     | 213 | 402 | 100              | 18                           | 137 | 287 | 98               | 0.75     | 0.75          | 0.27        |
|       | rs12412241    | A/G                       | 49                     | 270 | 324 | 99               | 36                           | 184 | 220 | 97               | 0.78     | 0.78          | 0.81        |
